# Supplementary material for: Hydrothermal synthesis, structures, and catalytic performance of five coordination compounds driven by 5-aminoisophthalic acid
Source: Royal Society of Chemistry journal article supplement (doi:10.1039/d4ra05352d), 2024-01-01
Supplement: d4ra05352d1.pdf [file d4ra05352d1.pdf]

## Electronic Supplementary Information (ESI)

### **Hydrothermal synthesis, structures, and catalytic performance of five coordination compounds driven by 5-aminoisophthalic acid**

Zhen-Zhong Mei, Hong-Yu Wang, Chao Ren, Ying Yang and Jin-Zhong Gu\*

*College of Chemistry and Chemical Engineering, Lanzhou University, Lanzhou 730000, People's Republic of China. E-mail: gujzh@lzu.edu.cn*

Electronic Supplementary Information (ESI) contains: FTIR spectra (Fig. S1), PXRD patterns (Fig. S2), additional catalysis data (Figs. S3–S6), catalytic mechanism (Scheme S1), structural parameters (Tables S1 and S2). CCDC-2367606–2367610.

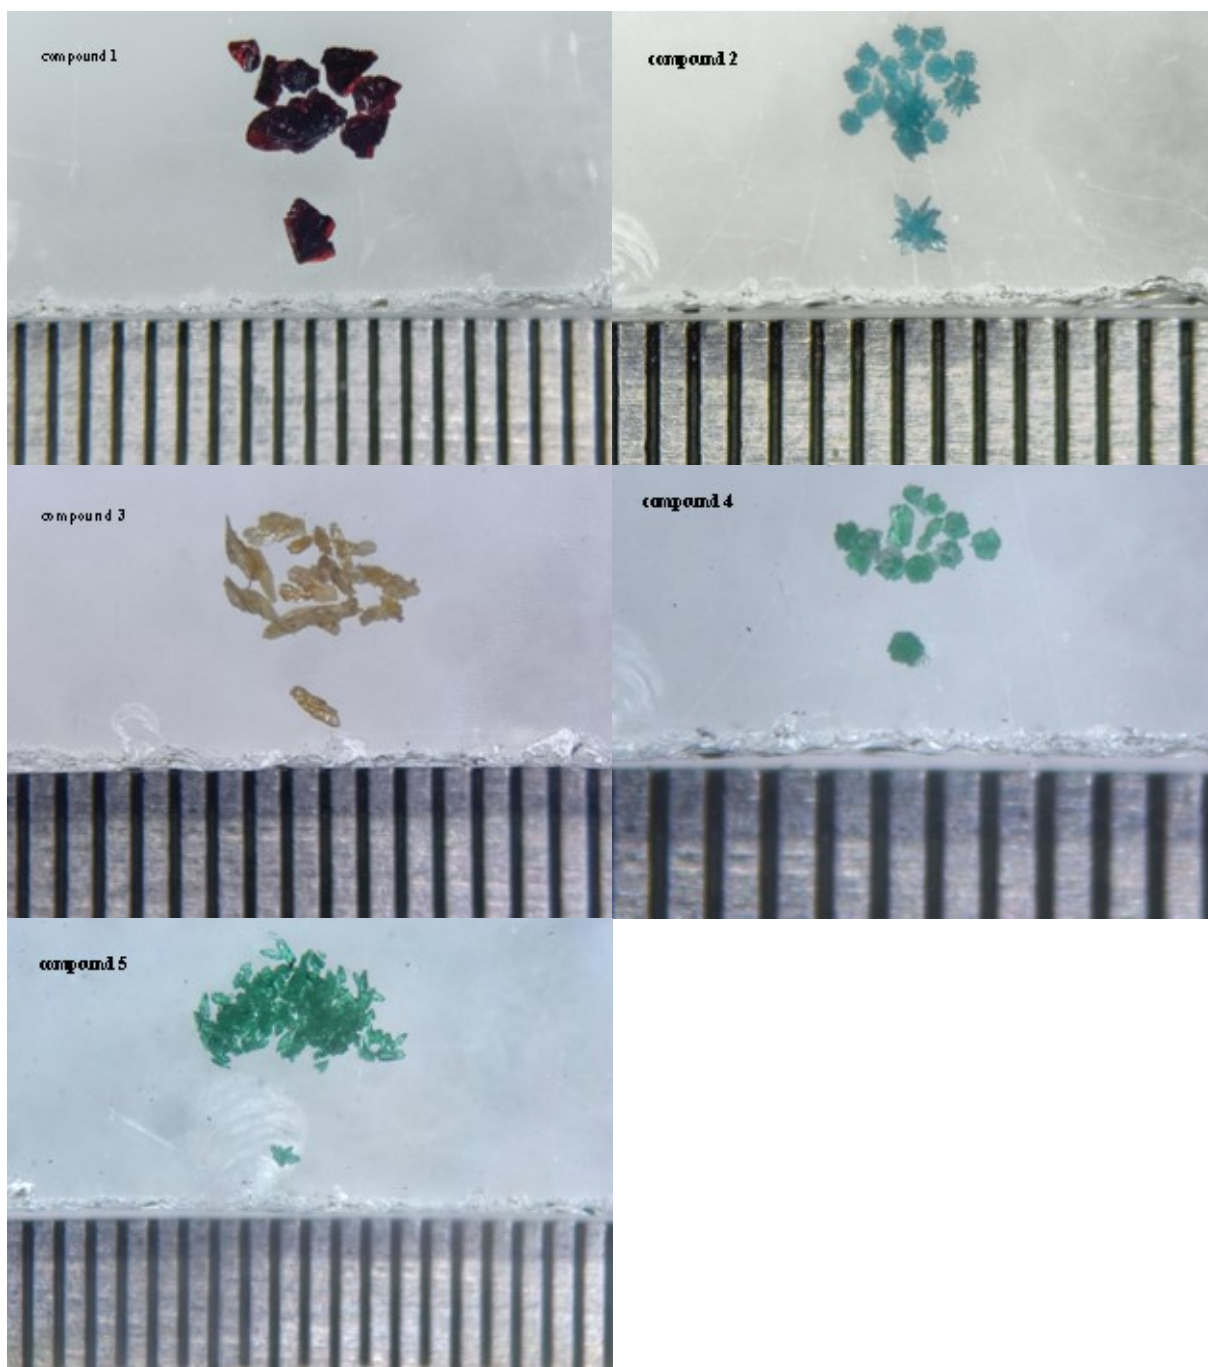

**Fig. S1.** The optical images of compounds 1–5. The minimum scale value is 0.5 mm.

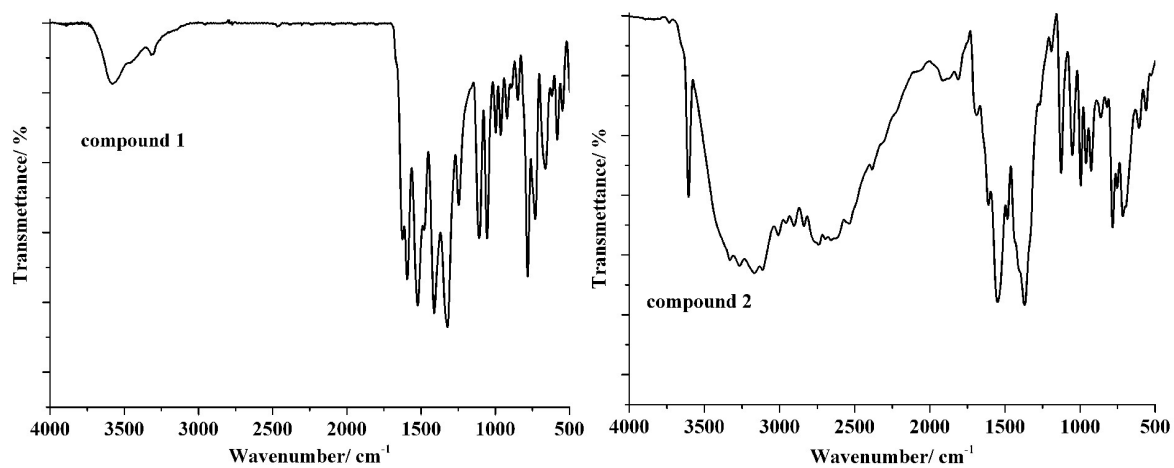

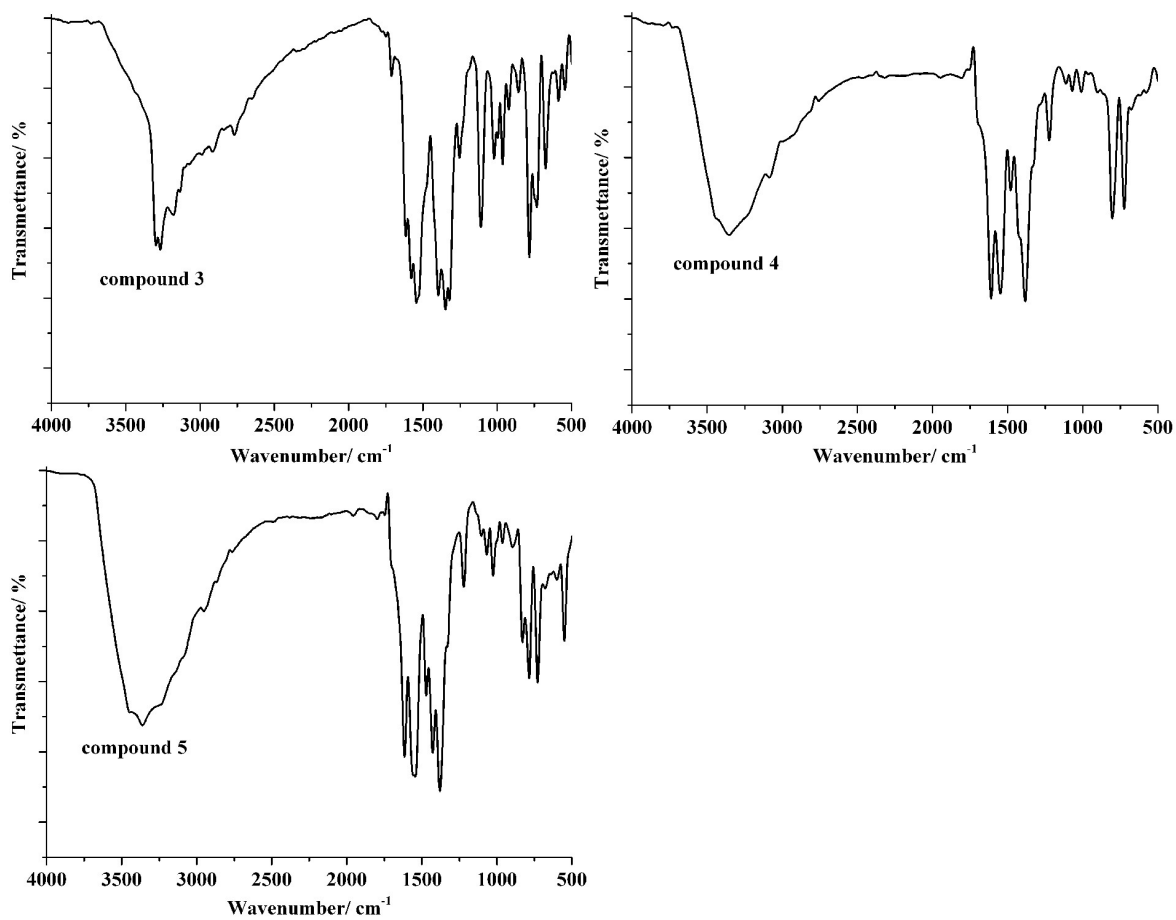

Fig. S2. FTIR spectra of compounds 1–5.

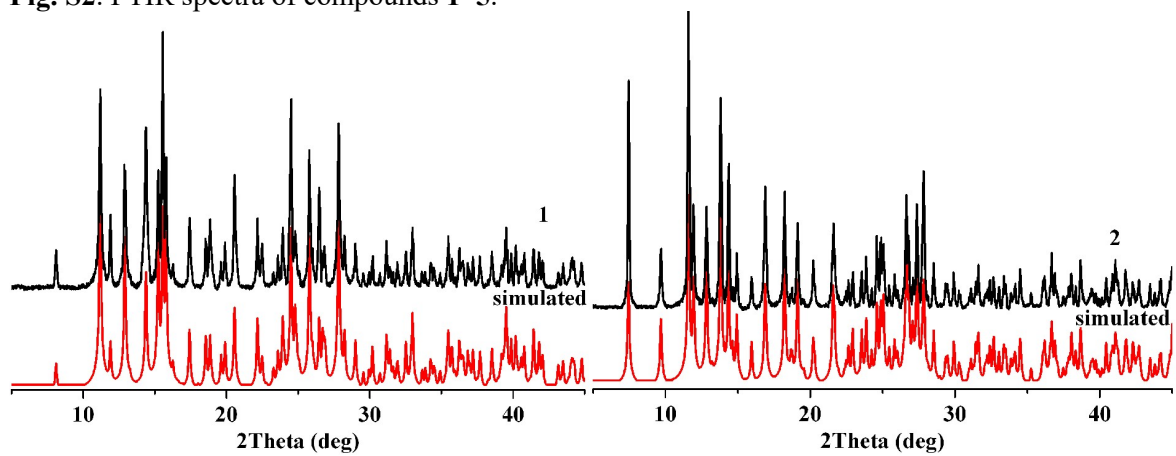

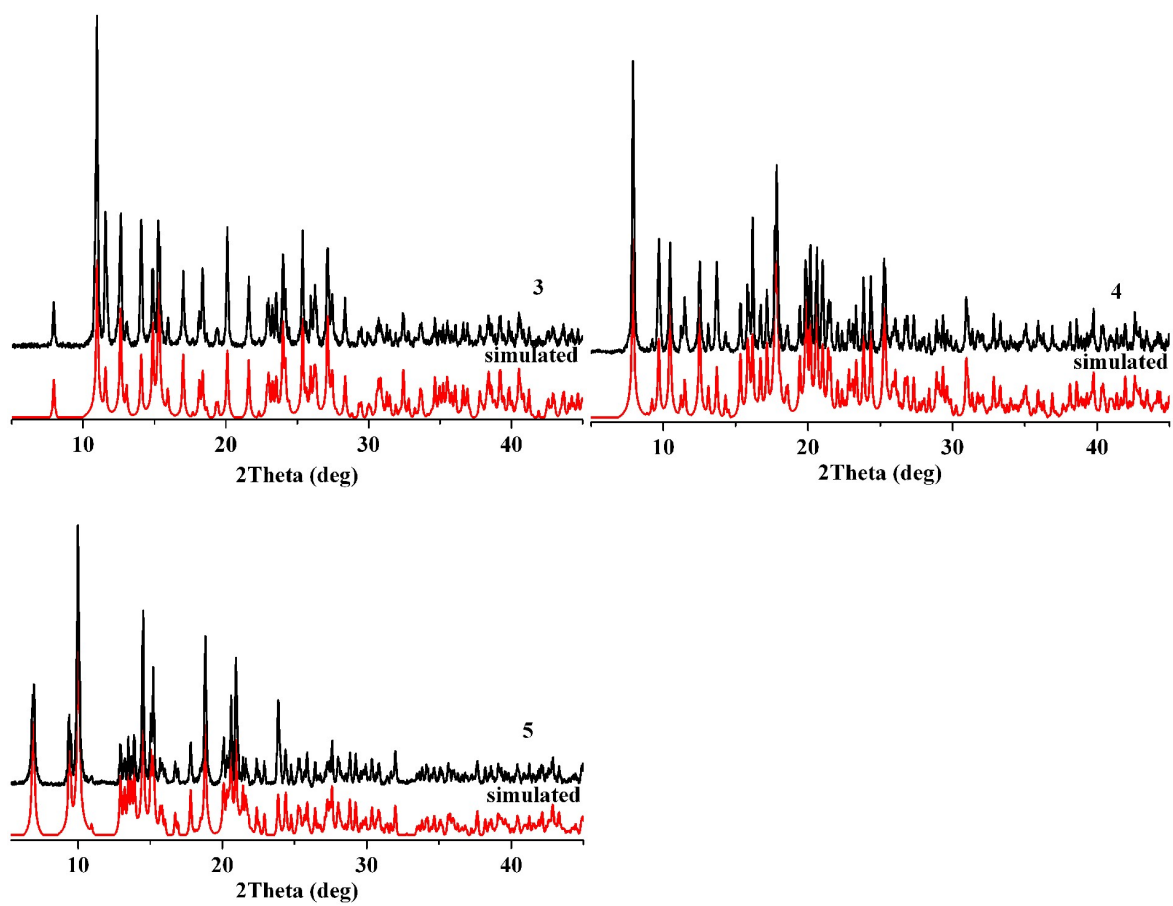

**Fig. S3.** PXRD patterns of compounds 1–5 at room temperature. Black patterns correspond to the experimental data obtained using the as-synthesized bulk samples. Red patterns were simulated from the single crystal X-ray data.

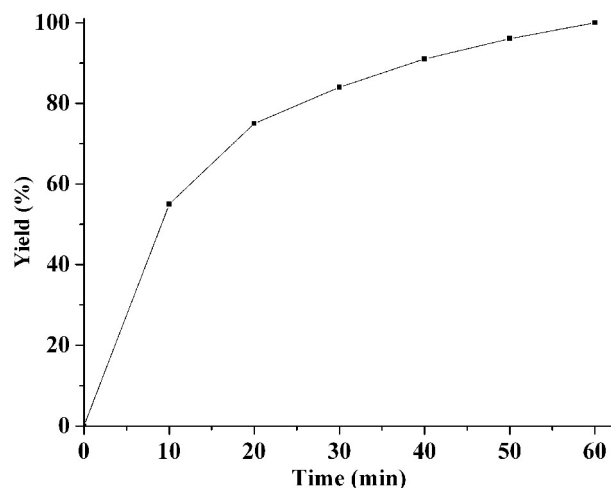

**Fig. S4.** Accumulation of product vs. time in the Knoevenagel reaction of pyridine-3-aldehyde with propanedinitrile catalysed by **3**. Reaction conditions are those of Table 2, entries 1–6.

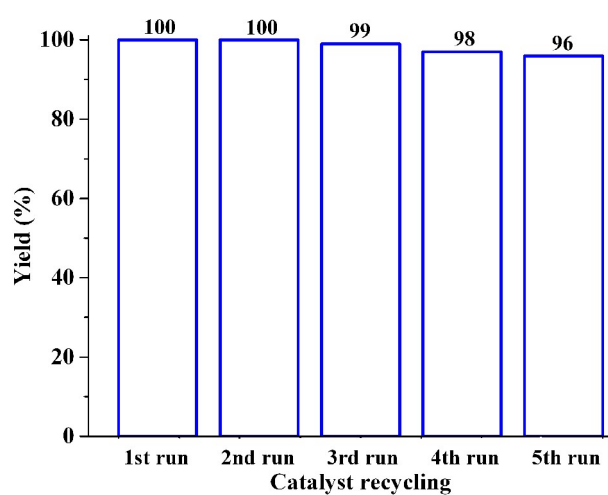

**Fig. S5.** Catalyst recycling experiments in the Knoevenagel reaction of pyridine-3-aldehyde with propanedinitrile catalysed by **3**. Reaction conditions are those of Table 2, entry 6.

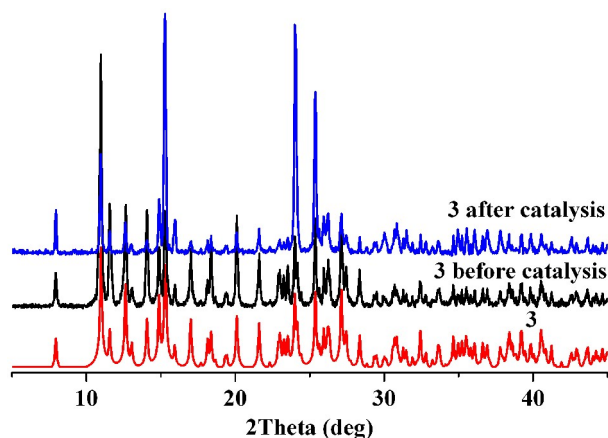

**Fig. S6.** PXRD patterns for **3**: simulated (red), before (black) and after (blue) catalytic experiments.

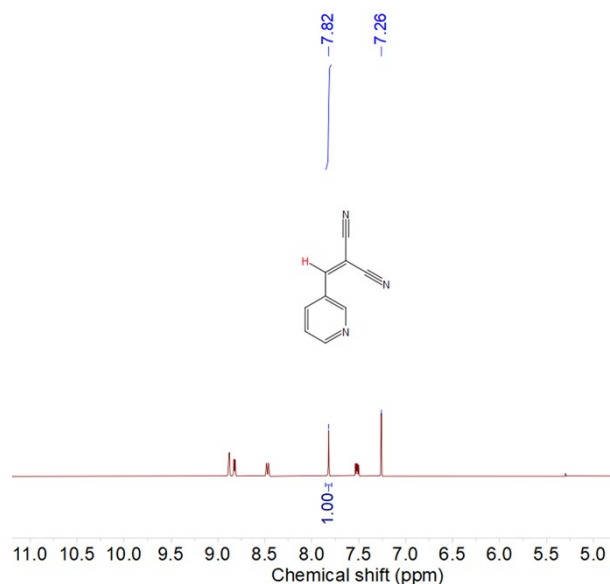

**Fig. S7.** Example of the integration in the  $^1\text{H}$  NMR spectrum of the reaction mixture for the determination of the Knoevenagel reaction product (conditions of Table 2, Entry 6).

**Examples of product yield calculation in the Knoevenagel reaction.** The C(=O) H signal of pyridine-3-aldehyde appears at  $\delta$ 10.11 ppm, while product shows a characteristic signal at  $\delta$ 7.82 ppm.

Total integration of both signals: unreacted pyridine-3-aldehyde + product = 0 + 1 = 1.

Percentage of the unreacted substrate:  $0/1 = 0$

Conversion of pyridine-3-aldehyde = yield of product =  $100 - 0 = 100\%$ .

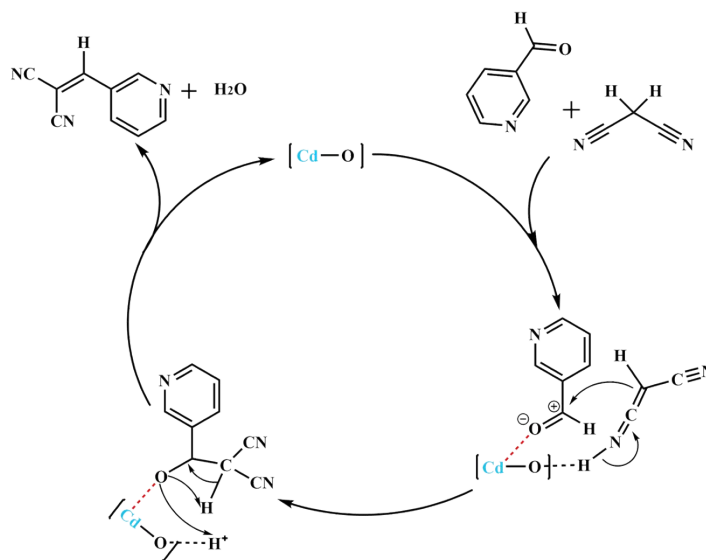

**Scheme S1.** Plausible mechanism for the Knoevenagel condensation reaction catalyzed by **3**.

**Table S1.** Selected bond lengths [ $\text{\AA}$ ] and angles [ $^\circ$ ] for compounds **1–5**.<sup>a</sup>

| 1                 |           |                   |           |                    |           |
|-------------------|-----------|-------------------|-----------|--------------------|-----------|
| Co(1)–O(1)        | 2.044(2)  | Co(1)–O(3)        | 2.399(2)  | Co(1)–O(4)i        | 2.111(2)  |
| Co(1)–N(1)ii      | 2.177(2)  | Co(1)–N(2)        | 2.087(2)  | Co(1)–N(5)         | 2.230(3)  |
| O(1)–Co(1)–N(2)   | 107.07(9) | O(1)–Co(1)–O(4)   | 101.69(8) | O(4)i–Co(1)–N(2)i  | 145.34(9) |
| O(1)–Co(1)–N(1)ii | 96.55(8)  | N(1)ii–Co(1)–N(2) | 104.43(9) | N(1)ii–Co(1)–O(4)i | 90.87(8)  |

|                     |            |                    |            |                      |            |
|---------------------|------------|--------------------|------------|----------------------|------------|
| O(1)–Co(1)–N(5)     | 91.79(9)   | N(2)–Co(1)–N(5)    | 76.90(9)   | O(4)i–Co(1)–N(5)     | 83.36(9)   |
| N(1)ii–Co(1)–N(5)   | 170.68(9)  | O(1)–Co(1)–O(3)i   | 159.46(7)  | N(2)–Co(1)–O(3)i     | 91.89(8)   |
| O(4)i–Co(1)–O(3)i   | 57.82(7)   | O(3)i–Co(1)–N(1)ii | 85.97(8)   | O(3)i–Co(1)–N(5)     | 84.76(8)   |
| <b>2</b>            |            |                    |            |                      |            |
| Ni(1)–O(1)          | 2.021(2)   | Ni(1)–O(5)         | 2.113(2)   | Ni(1)–O(6)           | 2.120(2)   |
| Ni(1)–N(1)i         | 2.164(2)   | Ni(1)–N(2)         | 2.072(2)   | Ni(1)–N(5)           | 2.102(2)   |
| O(1)–Ni(1)–N(2)     | 93.09(7)   | O(1)–Ni(1)–N(5)    | 172.95(7)  | N(5)–Ni(1)–N(2)      | 80.37(7)   |
| O(1)–Ni(1)–O(5)     | 90.45(7)   | O(5)–Ni(1)–N(2)    | 176.25(7)  | O(5)–Ni(1)–N(5)      | 96.14(7)   |
| O(1)–Ni(1)–O(6)     | 90.13(7)   | O(6)–Ni(1)–N(2)    | 90.17(7)   | O(6)–Ni(1)–N(5)      | 87.28(7)   |
| O(5)–Ni(1)–O(6)     | 91.05(7)   | O(1)–Ni(1)–N(1)i   | 87.87(7)   | N(1)i–Ni(1)–N(2)     | 91.90(7)   |
| N(1)i–Ni(1)–N(5)    | 94.94(7)   | N(1)i–Ni(1)–O(5)   | 87.00(7)   | N(1)i–Ni(1)–O(6)     | 177.19(7)  |
| <b>3</b>            |            |                    |            |                      |            |
| Cd(1)–O(2)          | 2.248(2)   | Cd(1)–O(3)i        | 2.285(2)   | Cd(1)–N(1)ii         | 2.341(2)   |
| Cd(1)–N(2)          | 2.257(2)   | Cd(1)–N(5)         | 2.447(3)   |                      |            |
| O(2)–Cd(1)–N(2)     | 114.04(9)  | O(2)–Cd(1)–O(3)i   | 99.45(7)   | O(3)i–Cd(1)–N(2)     | 137.41(8)  |
| O(2)–Cd(1)–N(1)ii   | 99.62(8)   | N(1)ii–Cd(1)–N(2)  | 108.28(9)  | O(3)i–Cd(1)–N(1)ii   | 90.25(8)   |
| O(2)–Cd(1)–N(5)     | 92.92(8)   | N(2)–Cd(1)–N(5)    | 72.01(9)   | O(3)i–Cd(1)–N(5)     | 81.12(9)   |
| N(1)ii–Cd(1)–N(5)   | 165.82(9)  |                    |            |                      |            |
| <b>4</b>            |            |                    |            |                      |            |
| Ni(1)–O(1)          | 2.052(2)   | Ni(1)–O(2)         | 2.192(2)   | Ni(1)–O(3)i          | 2.133(2)   |
| Ni(1)–O(4)i         | 2.082(2)   | Ni(1)–N(2)         | 2.050(2)   | Ni(1)–N(3)ii         | 2.062(2)   |
| N(2)–Ni(1)–O(1)     | 95.11(6)   | N(2)–Ni(1)–N(3)ii  | 97.29(6)   | N(3)ii–Ni(1)–O(1)    | 98.32(6)   |
| N(2)–Ni(1)–O(4)i    | 158.56(6)  | O(4)i–Ni(1)–O(1)   | 104.09(5)  | N(3)ii–Ni(1)–O(4)i   | 89.39(6)   |
| N(2)–Ni(1)–O(3)i    | 96.61(6)   | O(1)–Ni(1)–O(3)i   | 161.86(5)  | N(3)ii–Ni(1)–O(3)i   | 93.88(6)   |
| O(4)i–Ni(1)–O(3)i   | 62.50(5)   | N(2)–Ni(1)–O(2)    | 90.03(6)   | O(2)–Ni(1)–O(1)      | 62.03(5)   |
| N(3)ii–Ni(1)–O(2)   | 159.68(6)  | O(4)i–Ni(1)–O(2)   | 90.62(5)   | O(3)i–Ni(1)–O(2)     | 104.13(5)  |
| <b>5</b>            |            |                    |            |                      |            |
| Ni(1)–O(2)          | 2.002(3)   | Ni(1)–O(3)i        | 2.106(3)   | Ni(1)–O(4)i          | 2.160(3)   |
| Ni(1)–O(13)         | 2.059(4)   | Ni(1)–N(4)         | 2.089(4)   | Ni(1)–N(5)ii         | 2.081(4)   |
| Ni(2)–O(6)          | 2.014(3)   | Ni(2)–O(7)iii      | 2.093(3)   | Ni(2)–O(8)iii        | 2.158(4)   |
| Ni(2)–N(1)          | 2.145(4)   | Ni(2)–N(6)         | 2.078(4)   | Ni(2)–N(7)iv         | 2.124(4)   |
| Ni(3)–O(9)          | 2.019(3)   | Ni(3)–O(11)i       | 2.115(4)   | Ni(3)–O(12)i         | 2.107(3)   |
| Ni(3)–O(14)         | 2.070(4)   | Ni(3)–N(8)         | 2.078(4)   | Ni(3)–N(9)v          | 2.109(5)   |
| 2.109(5)            | 93.44(15)  | O(2)–Ni(1)–N(5)ii  | 90.43(15)  | O(13)–Ni(1)–N(5)ii   | 92.65(16)  |
| O(2)–Ni(1)–N(4)     | 88.82(15)  | O(13)–Ni(1)–N(4)   | 89.58(16)  | N(4)–Ni(1)–N(5)ii    | 177.69(19) |
| O(3)i–Ni(1)–O(2)    | 162.19(14) | O(13)–Ni(1)–O(3)i  | 104.24(15) | O(3)i–Ni(1)–N(5)ii   | 90.93(15)  |
| O(3)i–Ni(1)–N(4)    | 89.12(16)  | O(4)i–Ni(1)–O(2)   | 100.50(13) | O(4)i–Ni(1)–O(13)    | 165.66(13) |
| O(4)i–Ni(1)–N(5)iii | 90.62(15)  | O(4)i–Ni(1)–N(4)   | 87.37(15)  | O(3)i–Ni(1)–O(4)i    | 61.73(13)  |
| O(6)–Ni(2)–N(6)     | 89.28(16)  | O(6)–Ni(2)–O(7)iii | 163.45(16) | O(7)iii–Ni(2)–N(6)   | 88.47(16)  |
| O(6)–Ni(2)–N(7)iv   | 88.52(16)  | N(6)–Ni(2)–O(7)iii | 175.46(18) | N(7)iv–Ni(2)–O(7)iii | 92.51(15)  |
| O(6)–Ni(2)–N(1)     | 100.05(17) | N(6)–Ni(2)–N(1)    | 90.81(18)  | N(1)–Ni(2)–O(7)iii   | 96.38(15)  |
| N(7)iv–Ni(2)–N(1)   | 93.49(17)  | O(6)–Ni(2)–O(8)iii | 101.45(15) | N(6)–Ni(2)–O(8)iii   | 87.41(17)  |

|                       |            |                      |            |                    |            |
|-----------------------|------------|----------------------|------------|--------------------|------------|
| O(7)iii–Ni(2)–O(8)iii | 62.07(13)  | N(7)iv–Ni(2)–O(8)iii | 89.12(16)  | N(1)–Ni(2)–O(8)iii | 158.40(15) |
| O(9)–Ni(3)–O(14)      | 95.76(16)  | O(9)–Ni(3)–N(8)      | 90.04(16)  | N(8)–Ni(3)–O(14)   | 90.14(17)  |
| O(9)–Ni(3)–O(12)i     | 162.82(16) | O(12)i–Ni(3)–O(14)   | 101.39(17) | N(8)–Ni(3)–O(12)i  | 88.86(17)  |
| O(9)–Ni(3)–N(9)v      | 89.96(17)  | O(14)–Ni(3)–N(9)v    | 90.46(17)  | N(9)v–Ni(3)–N(8)   | 179.4(2)   |
| O(12)i–Ni(3)–N(9)v    | 90.97(17)  | O(9)–Ni(3)–O(11)i    | O(9)–      | O(14)–Ni(3)–O(11)i | 163.61(15) |
| N(8)–Ni(3)–O(11)i     | 89.61(17)  | O(11)i–Ni(3)–O(12)i  | 62.21(15)  | N(9)v–Ni(3)–O(11)i | 89.81(17)  |

---

<sup>a</sup> Symmetry transformations used to generate equivalent atoms: **(1)** i:  $x+1, y-1, z$ ; ii:  $x+1, y, z$ ; **(2)** i:  $-x+1, -y+2, -z+1$ ; **(3)** i:  $x-1, y+1, z$ ; ii:  $x-1, y, z$ ; **(4)** i:  $x-1/2, -y+3/2, z+1/2$ ; ii:  $-x+1/2, y+1/2, -z+1/2$ ; **(5)** i:  $x+1, y, z$ ; ii:  $x, y-1, z$ ; iii:  $x-1, y, z$ ; iv:  $x, y, z+1$ ; v:  $x, y, z-1$ .



**Table S2.** Hydrogen bonds in crystal packing [ $\text{\AA}$ ,  $^\circ$ ] of **1–5**.

| Compound | D–H $\cdots$ A             | $d(\text{D–H})$ | $d(\text{H}\cdots\text{A})$ | $d(\text{D}\cdots\text{A})$ | $\angle\text{DHA}$ | Symmetry code                |
|----------|----------------------------|-----------------|-----------------------------|-----------------------------|--------------------|------------------------------|
| <b>1</b> | N(1)–H(1A) $\cdots$ O(2)   | 0.890           | 2.466                       | 3.213                       | 141.88             | $-x, -y, -z + 2$             |
|          | N(1)–H(1B) $\cdots$ O(4)   | 0.890           | 2.123                       | 2.943                       | 152.99             | $-x - 1, -y + 1, -z + 2$     |
|          | N(3)–H(1) $\cdots$ O(3)    | 0.860           | 1.979                       | 2.735                       | 146.05             | $-x + 1, -y + 1, -z + 1$     |
|          | N(4)–H(2) $\cdots$ O(1)    | 0.860           | 2.274                       | 2.989                       | 140.56             | $-x + 1, -y, -z + 1$         |
| <b>2</b> | N(1)–H(5A) $\cdots$ O(7)   | 0.890           | 2.282                       | 3.144                       | 162.85             |                              |
|          | N(1)–H(5B) $\cdots$ O(8)   | 0.890           | 2.258                       | 3.117                       | 162.09             | $-x + 1, -y + 1, -z + 1$     |
|          | N(3)–H(1) $\cdots$ O(4)    | 0.860           | 1.861                       | 2.717                       | 172.86             | $x - 1, y + 1, z$            |
|          | N(4)–H(2) $\cdots$ O(3)    | 0.860           | 1.814                       | 2.674                       | 179.13             | $x - 1, y + 1, z$            |
|          | O(5)–H(1W) $\cdots$ O(2)   | 0.852           | 1.915                       | 2.667                       | 146.39             |                              |
|          | O(5)–H(2W) $\cdots$ O(2)   | 0.853           | 1.954                       | 2.785                       | 164.74             | $-x + 1, y + 1/2, -z + 3/2$  |
|          | O(6)–H(3W) $\cdots$ O(8)   | 0.852           | 2.135                       | 2.913                       | 151.49             |                              |
|          | O(6)–H(4W) $\cdots$ O(4)   | 0.852           | 1.902                       | 2.738                       | 166.76             | $-x + 1, y + 1, -z + 1$      |
|          | O(7)–H(5W) $\cdots$ O(5)   | 0.850           | 1.938                       | 2.774                       | 167.82             | $x, -y + 3/2, z - 1/2$       |
|          | O(7)–H(6W) $\cdots$ O(3)   | 0.850           | 1.879                       | 2.729                       | 179.57             | $-x + 1, -y + 1, -z + 1$     |
|          | O(8)–H(7W) $\cdots$ N(5)   | 0.850           | 2.644                       | 3.232                       | 129.43             | $x, y - 1, z$                |
|          | O(8)–H(8W) $\cdots$ O(7)   | 0.850           | 1.844                       | 2.664                       | 161.47             | $x, -y + 3/2, z + 1/2$       |
| <b>3</b> | N(1)–H(1A) $\cdots$ O(2)   | 0.890           | 2.324                       | 3.118                       | 148.56             | $-x + 2, -y + 2, -z$         |
|          | N(1)–H(1B) $\cdots$ O(3)   | 0.890           | 2.133                       | 2.934                       | 149.27             | $-x + 3, -y + 1, -z$         |
|          | N(3)–H(1) $\cdots$ O(4)    | 0.860           | 1.982                       | 2.743                       | 146.97             | $-x + 1, -y + 1, -z + 1$     |
|          | N(4)–H(2) $\cdots$ O(2)    | 0.860           | 2.278                       | 2.991                       | 140.39             | $-x + 1, -y + 2, -z + 1$     |
| <b>4</b> | N(1)–H(1A) $\cdots$ O(5)   | 0.862           | 2.211                       | 2.975                       | 147.75             | $x + 1, y, z$                |
|          | O(5)–H(1W) $\cdots$ N(4)   | 0.850           | 2.050                       | 2.891                       | 170.00             | $x, y, z + 1$                |
|          | O(5)–H(2W) $\cdots$ O(1)   | 0.850           | 1.925                       | 2.767                       | 170.30             | $x - 1/2, -y + 3/2, z + 1/2$ |
| <b>5</b> | N(1)–H(1B) $\cdots$ O(5)   | 0.890           | 2.180                       | 2.919                       | 140.15             |                              |
|          | O(13)–H(2W) $\cdots$ O(1)  | 0.872           | 1.919                       | 2.661                       | 142.05             |                              |
|          | O(14)–H(4W) $\cdots$ O(10) | 0.884           | 1.877                       | 2.634                       | 142.63             |                              |
